# Supplementary material for: Cardioprotective Antioxidant and Anti-Inflammatory Mechanisms Induced by Intermittent Hypobaric Hypoxia
Source: MDPI journal article supplement (doi:10.3390/antiox11061043), 2022-05-25
Supplement: s1 [file s1]

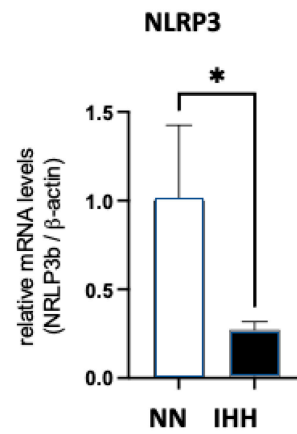

Figure S1. Expression levels of NLRP3 inflammasome and IL-1 $\beta$ . The cardiac mRNA relative levels of NLRP3 inflammasome (Figure S1) Groups are NN: normobaric normoxia (n=6) and IHH: intermittent hypobaric hypoxia (N=6). Data are expressed in mean  $\pm$  SEM. Significant differences ( $p \leq 0.05$ ): \* vs. N.
